# Protection from Local Anesthetic-induced Convulsions by $\gamma$ -aminobutyric Acid

Masahiro Ikeda, D.D.S., Ph.D.,\* Toshihiro Dohi, Ph.D.,† Akira Tsujimoto, M.D., Ph.D.‡

The effects of gamma-aminobutyric acid (GABA) on the induction of convulsions by local anesthetics were investigated in mice and rats. Intraventricular administration of 0.8–1.6 mg GABA protected rats against convulsions induced by procaine, lidocaine, cocaine, and tetracaine in a dose-related manner. Intraperitoneal  $\gamma$ -acetylenic GABA was also effective against procaine-induced convulsions in mice, but the metabolites of GABA,  $\gamma$ -hydroxybutyrate, and  $\gamma$ -butyrolactone were without effect. Intraventricular GABA, 1.6 mg, delayed the onset of convulsions induced by hydrazine, but had no influence on the incidence of convulsions induced by nicotine, pentylenetetrazol, picrotoxin, or strychnine. These results suggest that the GABA system may be involved in the mechanisms of local anesthetic-induced convulsions. (Key words: Anesthetics, local: cocaine; lidocaine; procaine; tetracaine. Brain: convulsions; gamma-aminobutyric acid.)

A MAJOR COMPLICATION of local anesthetic administration is the development of generalized tonic-clonic convulsion. Electrophysiologic studies in experimental animals have revealed that local anesthetics produce excitatory effects on the limbic system which are most striking in the amygdaloid nuclear complex.<sup>1-3</sup> Furthermore, a recent study by an autoradiographic analysis of cerebral metabolism during lidocaine-induced seizure activity has demonstrated that the hippocampus developed a striking increase in metabolic activity coupled with increased neurophysiologic seizure activity.<sup>4</sup> It is generally agreed that convulsions produced by local anesthetics are not due to direct stimulation, but to selective depression of inhibitory neurones.<sup>5,6</sup> Thus, release from inhibition presumably gives rise to enhanced or unrestrained excitability. This interpretation was supported by an electrophysiologic study which demonstrated that lidocaine blocked inhibitory synapses of rabbit cortical neurones, but had comparatively little effect on excitatory synapses.<sup>7</sup> Lidocaine also facilitates the spinal monosynaptic reflex, suggesting suppression of certain inhibitory spinal functions in preference to excitatory functions.<sup>8</sup>

Based on these concepts, we hypothesize from the biochemical point of view, that local anesthetics block the

function of inhibitory neurones by deranging the dynamic metabolism of the neurotransmitter or the interaction with its receptor and the subsequent events. Assuming that  $\gamma$ -aminobutyric acid (GABA) is a transmitter at inhibitory synapses and that benzodiazepines which have potentiating effects on the released GABA action is effective in blocking or treating local anesthetic-induced convulsions,<sup>9</sup> we designed a study to investigate whether exogenously administered GABA could antagonize local anesthetic-induced convulsions.

## Methods

Male dd strain mice weighing 25 to 30 g, and male Wistar rats weighing 140 to 220 g were housed in an animal breeding room where the temperature was maintained at  $22 \pm 2^\circ\text{C}$ . They had free access to food and water at all times until two hours before experiments. All experiments were carried out between 1 P.M. – 4 P.M.

Various drugs as described below were dissolved into 0.9 per cent saline and injected subcutaneously (sc) or intraperitoneally (ip) in a volume of 0.05 ml/10 g to mice and 0.1 ml/100 g to rats. Some were administered into a lateral ventricle according to the procedure of Krammer *et al.*<sup>10</sup> In brief, rats were given intravenous succinylcholine chloride (0.3 mg/kg) and fixed in a stereotaxic device. The animals recovered normal muscle function after about 1 min. A hole in the coronal suture, 1.5 mm lateral to the bregma, was made by an electric motor handpiece and a 27-gauge needle was inserted to a depth of 4 mm from the surface of the skull. Needle placement was verified at the end of the study by dissection after injection of indian ink. Twenty-five microliter of drug solution (pH was adjusted to 7.4) was injected. Control animals underwent the same operation and were given an equal volume of 0.9 per cent saline. The operation and injection were completed within a minute after succinylcholine injection. Convulsive responses induced by the injected drugs were evaluated by observing for signs of clonic convulsion.

Procaine, 250 mg/kg (180 mg/kg for mice), lidocaine, 100 mg/kg, cocaine, 55 mg/kg, and tetracaine, 35 mg/kg, were administered intraperitoneally in rats. Other agents used for inducing convulsions in rats were 3 mg/kg nicotine, ip, 60 mg/kg pentylenetetrazol, ip, 5 mg/kg

\* Research Associate.

† Instructor.

‡ Professor.

Received from the Department of Pharmacology, Hiroshima University, School of Dentistry, Kasumi, Hiroshima 734, Japan. Accepted for publication October 14, 1981. Supported in part by a Grant-in Aid for Scientific Research, No. C-157428 from the Ministry of Education, Japan. Presented in part at the General Meeting of Japanese Pharmacological Society, Osaka, Japan, March 1976.

Address reprint requests to Dr. Tsujimoto.

§ Braestrup C, Nielsen M: Searching for endogenous benzodiazepine receptor ligands. *Trends in Pharmacological Sciences* 1:424-427, 1980.

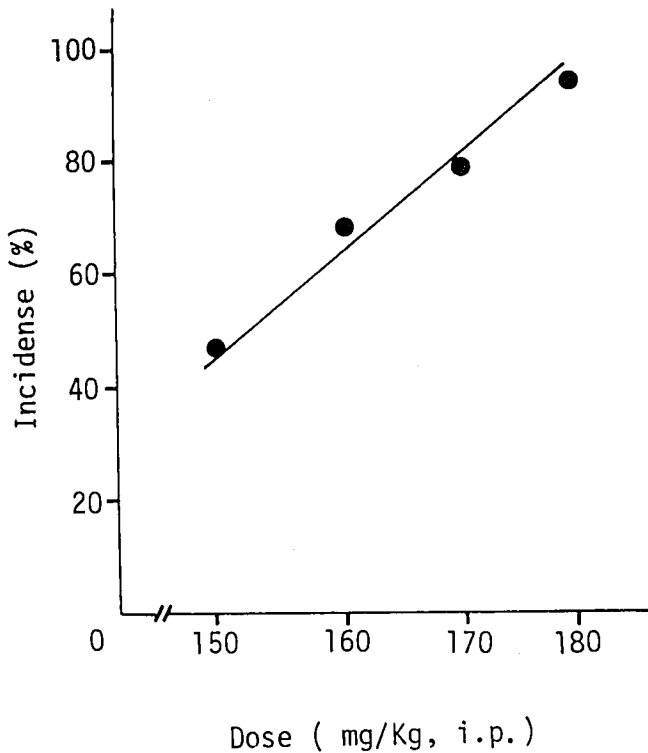

FIG. 1. Dose-response relationship between incidence of convulsions and procaine dosage in mice.

picrotoxin, sc, 1.8 mg/kg strychnine, ip, and 400 mg/kg hydrazine, ip. Used also were GABA,  $\gamma$ -hydroxybutyrate (GHB),  $\gamma$ -butyrolactone (GBL), and  $\gamma$ -acetylenic GABA (GAG) delivered intraperitoneally (mg/kg) or intraven- tricularly (mg/animal) 15 to 30 min or 4 h before the

injection of the convulsive agents in doses indicated in the text. More than 10 rats and 16 mice were used for each group. Statistical analysis was performed by  $\chi^2$  analysis of  $2 \times 2$  contingency table or Student's *t* test (NS = not significant,  $P > 0.05$ ).

### Results

Procaine in doses greater than 150 mg/kg administered intraperitoneally to mice produced ataxia, jumping, clonic convulsion (in some cases, tonic convulsion) at about 5 min after the injection. Frequency of convulsions increased in proportion to the dose of procaine in the range of 150–180 mg/kg as shown in figure 1. The mortality rate at a dose of 180 mg/kg was 30 per cent. A similar convulsive pattern was induced by various local anesthetics in rats. The order of potency of local anesthetics for causing convulsions was in agreement with that for their intrinsic local anesthetic activity. For instance, doses of procaine, lidocaine, cocaine, and tetracaine required to produce more than an 80 per cent incidence of convulsions in rats were 250, 100, 55, and 35 mg/kg, respectively.

Intraperitoneal GABA did not influence the incidence of procaine convulsions in mice, except when administered in extremely large doses (table 1), but when administered intraven- tricularly 30 min prior to the injection of procaine, the incidence was reduced in a dose related manner. It was similarly effective against lidocaine-, cocaine-, and tetracaine-induced convulsions. Transient depression of spontaneous movement was induced by GABA injection in a dose of 0.8 mg. At higher doses, righting reflex was lost shortly after injection, but re-

TABLE 1. Effect of GABA on Various Local Anesthetic-induced Convulsions

| Local Anesthetics (mg/kg)* | Animal Species Studied | GABA Dosage (mg/animal)† | Number of Injection | Number Animals Convulsed | Per Cent Animals Convulsed | Significance‡                  |
|----------------------------|------------------------|--------------------------|---------------------|--------------------------|----------------------------|--------------------------------|
| Procaine 180 mg/kg         | Mouse                  | 0                        | 36                  | 34                       | 94                         | NS<br><0.05<br><0.001<br><0.01 |
|                            |                        | 250                      | 16                  | 13                       | 81                         |                                |
|                            |                        | 500                      | 16                  | 11                       | 69                         |                                |
|                            |                        | 1,000                    | 36                  | 19                       | 53                         |                                |
|                            |                        | 2,000                    | 36                  | 20                       | 56                         |                                |
| Procaine 250 mg/kg         | Rat                    | 0                        | 28                  | 24                       | 86                         | <0.05<br><0.001<br><0.001      |
|                            |                        | 0.8                      | 10                  | 4                        | 40                         |                                |
|                            |                        | 1.0                      | 10                  | 2                        | 20                         |                                |
|                            |                        | 1.6                      | 10                  | 0                        | 0                          |                                |
| Lidocaine 100 mg/kg        | Rat                    | 0                        | 10                  | 8                        | 80                         | <0.01                          |
|                            |                        | 1.6                      | 10                  | 0                        | 0                          |                                |
| Cocaine 55 mg/kg           | Rat                    | 0                        | 10                  | 8                        | 80                         | <0.01                          |
|                            |                        | 1.6                      | 10                  | 0                        | 0                          |                                |
| Tetracaine 35 mg/kg        | Rat                    | 0                        | 10                  | 10                       | 100                        | <0.001                         |
|                            |                        | 1.6                      | 10                  | 1                        | 10                         |                                |

\* Drugs were administered intraperitoneally.

† Drugs were administered intraven- tricularly except dosage in mice represents mg/kg intraperitoneally. GABA was administered 30 min-

utes prior to local anesthetic administration.

‡ Determined by  $\chi^2$  analysis of  $2 \times 2$  contingency table.

TABLE 2. Effect of  $\gamma$ -Hydroxybutyrate (GHB),  $\gamma$ -Butyrolactone (GBL), and  $\gamma$ -Acetylenic GABA (GAG) on Procaine-induced Convulsions

| Procaine  | Animal | Control   | GHB          |                | GBL          | GAG          |
|-----------|--------|-----------|--------------|----------------|--------------|--------------|
|           |        |           | 400 mg/kg ip | 1.9 mg/rat ivc | 400 mg/kg ip | 100 mg/kg ip |
| 250 mg/kg | Rat    | 80<br>100 | 90 (NS)      | 80 (NS)        | 80 (NS)      |              |
| 180 mg/kg | Mouse  | 90        |              |                |              | 30 (<0.001)  |

Procaine was administered at 15 min after GHB and GBL injection, and 4 h after GAG injection.

Results were expressed as per cent incidence of convulsing. Ten rats

and 20 mice were used for each group. Statistical analysis was performed as shown in table 1.

turned in 3 min, while slight depression of spontaneous motor activity was observed at 30 min after administration. Both  $\gamma$ -hydroxybutyrate and  $\gamma$ -butyrolactone, metabolites of GABA, caused depression of spontaneous motor activity or loss of righting reflex for a period of 30 min. However, neither influenced the incidence of convulsions (table 2). The effect of  $\gamma$ -acetylenic GABA was examined because it increases brain GABA concentration by irreversible inhibition of GABA transaminase (GABA-T) activity.<sup>11</sup>  $\gamma$ -Acetylenic GABA protected mice from convulsions induced by procaine (table 2).

Intraventricularly administered GABA had no effect on the incidences of convulsions induced by nicotine, pentylenetetrazol, picrotoxin, or strychnine (table 3), and did not alter the incidence of convulsions induced by hydrazine, but did delay its onset.

### Discussion

GABA is considered to be a major inhibitory transmitter in the brain and plays an important role in seizure etiology. Hydrazine derivatives, certain pyridoxine antagonists, allylglycine, and 3-mercaptopropionic acid are inhibitors of glutamic acid decarboxylase (GAD), an enzyme necessary for GABA synthesis, and are potent convulsants. Other convulsive agents, *e.g.*, bicuculline and picrotoxin, are thought to act as specific inhibitors of postsynaptic GABA receptors and GABA ionophores,

respectively.<sup>12,13</sup> Conversely, some anticonvulsants, *e.g.*, aminooxyacetic acid, n-depropylacetate,  $\gamma$ -acetylenic GABA, and  $\gamma$ -vinyl GABA share the inhibitory activity of GABA-T and increase brain GABA concentration.<sup>14,15</sup> Other investigators have suggested the importance of GAD activity for controlling GABA concentration in the synaptic cleft and for seizure protection.<sup>16,17</sup> This evidence suggests that modulation of the GABA system may be closely associated with the development of or protection from seizure, although the majority of convulsants and anticonvulsants exert their activity without involving the GABA system.

In the present studies, we demonstrated that the induction of convulsions by various local anesthetics was prevented by intraventricular GABA administration in rats.  $\gamma$ -Hydroxybutyrate and  $\gamma$ -butyrolactone are GABA metabolites and are known to have anesthetic properties accompanied by a striking increase in brain dopamine levels.<sup>18</sup> These metabolites caused loss of righting reflex in the rats in this experiment. Nevertheless, procaine still produced convulsions in rats pretreated with anesthetic doses of these metabolites. These results suggest that the anticonvulsant activity of GABA is not due to the action of these metabolites, nor is it secondary to their sedative or paralytic effect. That GABA is not a nonspecific anticonvulsant against all experimentally produced convulsions is demonstrated by its lack of activity against convulsions induced by nicotine, pentylenetetrazol, and

TABLE 3. Effect of Intraventricular Injection of GABA on Convulsions Induced by Various Types of Convulsants

|                   | Dose and Route (mg/kg) | Per Cent Incidence of Convulsion |                              |
|-------------------|------------------------|----------------------------------|------------------------------|
|                   |                        | Control (n = 10)                 | GABA 1.6 mg/rat ivc (n = 10) |
| Nicotine          | 3 ip                   | 80                               | 90                           |
| Pentylenetetrazol | 60 ip                  | 80                               | 70                           |
| Picrotoxin        | 5 sc                   | 100                              | 100                          |
| Strychnine        | 1.8 ip                 | 70                               | 100                          |
| Hydrazine         | 400 ip                 | 90                               | 80                           |
|                   |                        | (19.3 ± 1.7*)                    | (61.0 ± 6.2*†)               |

\* Time in min between injection of hydrazine and appearance of convulsion (Mean ± SEM).

† Significant difference from control by Student *t* test, *P* < 0.01.

strychnine. Although, both hydrazine and picrotoxin are convulsive agents which involve the GABA system, GABA was only effective against convulsions induced by hydrazine. The difference in anticonvulsant activity may be explained by the different sites of action of the two convulsants. Namely, hydrazine blocks the GABA system by decreasing GABA concentration in the brain; this can be restored by exogenously administered GABA. On the other hand, picrotoxin acts on the postsynaptic GABA ionophore, thereby preventing augmented GABA from exerting its inhibitory effects. Our results are in agreement with the reported lack of effect of  $\gamma$ -acetylenic GABA on picrotoxin-induced seizures.<sup>11</sup>  $\gamma$ -Acetylenic GABA and  $\gamma$ -vinyl GABA are catalytic irreversible inhibitors of GABA-T.¶ Schechter *et al.*<sup>14</sup> reported that the increase in brain GABA levels induced by these inhibitors correlated well with their antiseizure activity against audiogenic seizure. We also demonstrated through our study that local anesthetic-induced convulsions were prevented by  $\gamma$ -acetylenic GABA. This evidence strongly supports the hypothesis that local anesthetics may derange the brain GABA function and disrupt inhibitory input, resulting in increased excitation and convulsions.

The authors thank Centre de Recherche Merrell International, Strasbourg, France for the gift of  $\gamma$ -acetylenic  $\gamma$ -aminobutyric acid and Fujisawa Pharmaceutical CO. LTD, Japan for the gift of lidocaine.

### References

- Eidelberg E, Lesse H, Gault FP: An experimental model of temporal lobe epilepsy. Studies of the convulsant properties of cocaine, EEG and Behavior. Edited by Glaser GH. New York, Basic Books, 1963, pp 272-283
- Wagman IH, de Jong RH, Prince DA: Effects of lidocaine on the central nervous system. ANESTHESIOLOGY 28:155-172, 1967
- Wagman IH, de Jong RH, Prince DA: Effects of lidocaine on spontaneous cortical and subcortical electrical activity. Production of seizure discharges. Arch Neurol 18:277-290, 1968
- Ingvar M, Shapiro HM: Selective metabolic activation of the hippocampus during lidocaine-induced pre-seizure activity. ANESTHESIOLOGY 54:33-37, 1981
- Koppanyi T: The sedative, central analgesic and anticonvulsant actions of local anesthetics. Am J Med Sci 244:646-654, 1962
- Frank GB, Saunders HD: A proposed common mechanism of action for general and local anaesthetics in the central nervous system. Br J Pharmacol 21:1-9, 1963
- Tanaka K, Yamasaki M: Blocking of cortical inhibitory synapses by intravenous lidocaine. Nature 209:207-208, 1966
- de Jong RH, Robles R: Central actions of lidocaine-synaptic transmission. ANESTHESIOLOGY 30:19-23, 1969
- Covino BG, Vassallo HG: Local Anesthetics: Mechanisms of Action and Clinical Use. New York, Grune & Stratton Inc, 1976, pp 123-161
- Kramer SZ, Seifter J, Bhagat B: Regional distribution of tritiated acetylcholine in rat brain. Nature 217:184-185, 1968
- Schechter PJ, Tranier Y, Jung MJ, et al: Antiseizure activity of  $\gamma$ -acetylenic  $\gamma$ -aminobutyric acid: a catalytic irreversible inhibitor of  $\gamma$ -aminobutyric acid transaminase. J Pharmacol Exp Ther 201:606-612, 1977
- Ticku MK, Van Ness PC, Haycock JW, et al: Dihydropicrotoxin binding sites in rat brain: comparison to GABA receptors. Brain Res 150:642-647, 1978
- Curtis DR, Duggan AW, Felix D, et al: GABA, bicuculline and central inhibition. Nature 226:1222-1224, 1970
- Schechter PJ, Trainer Y, Jung MJ, et al: Audiogenic seizure protection by elevated brain GABA concentration in mice: effects of  $\gamma$ -acetylenic GABA and  $\gamma$ -vinyl GABA, two irreversible GABA-T inhibitors. Eur J Pharmacol 45:319-328, 1977
- Kuriyama K, Roberts E, Rubinstein MK: Elevation of gamma-aminobutyric acid in brain with amino-oxyacetic acid and susceptibility to convulsive seizures in mice: a quantitative re-evaluation. Biochem Pharmacol 15:221-236, 1966
- Tapia R: The role of  $\gamma$ -aminobutyric acid metabolism in the regulation of cerebral excitability. Neurohumoral Coding of Brain Function. Edited by Myers RD. New York, Plenum Press, 1974, pp 3-20
- Wood JD, Peesker SJ: Development of an expression which relates the excitable state of the brain to the level of GAD activity and GABA content, with particular reference to the action of hydrazine and its derivatives. J Neurochem 23:703-712, 1974
- Gessa GL, Vargiv L, Crabai F, et al: Selective increase of brain dopamine induced by gamma-hydroxybutyrate. Life Sci 5:1921-1930, 1966

¶ Metcalf BW, Casara P: Regiospecific 1,4 addition of a propargylic anion. A General synthon for 2-substituted propargylamines as potential catalytic irreversible enzyme inhibitors. Tetrahedron Letters 38:3337-3340, 1975
